# Supplementary material for: Activation of molecular oxygen over Mn-doped La2CuO4perovskite for direct epoxidation of propylene
Source: Royal Society of Chemistry journal article supplement (doi:10.1039/d1cy02185k), 2022-01-01
Supplement: d1cy02185k1.pdf [file d1cy02185k1.pdf]

## Supporting Information

Xinxin Zhang,<sup>a</sup> Jiajun Dai,<sup>a</sup> Jiageng Ding,<sup>a</sup> Kok Bing Tan,<sup>a</sup> Guowu Zhan,<sup>b</sup> Jiale Huang,<sup>a\*</sup> and Qingbiao Li<sup>a,c</sup>

<sup>a</sup>Department of Chemical and Biochemical Engineering, College of Chemistry and Chemical Engineering, Xiamen University, Xiamen 361005, P. R. China

<sup>b</sup>College of Chemical Engineering, Huaqiao University, Xiamen 361021, P. R. China

<sup>c</sup>College of Food and Biology Engineering, Jimei University, Xiamen 361021, P. R. China

\*Corresponding author, E-mail address: cola@xmu.edu.cn (J. Huang).

### This file includes:

Figures.S1 to S12

Scheme S1

Table.S1 to S3

References

### 1. Figures. S1 to S12

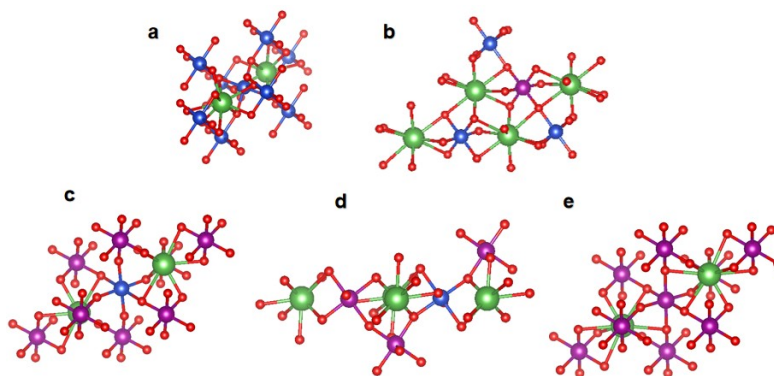

Figure S1. schematic illustrations of (a)  $\text{La}_2\text{CuO}_4$ , (b)  $\text{LaMn}_{0.25}\text{Cu}_{0.75}\text{O}_3$ , (c)  $\text{LaMn}_{0.5}\text{Cu}_{0.5}\text{O}_3$ , (d)  $\text{LaMn}_{0.75}\text{Cu}_{0.25}\text{O}_3$ , (e)  $\text{LaMnO}_3$

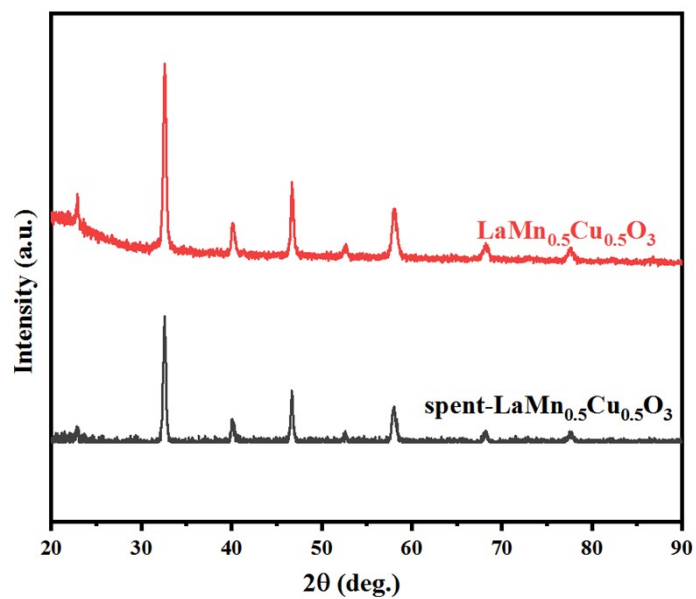

Figure S2. XRD patterns of as-prepared  $\text{LaMn}_{0.5}\text{Cu}_{0.5}\text{O}_3$  sample and spent- $\text{LaMn}_{0.5}\text{Cu}_{0.5}\text{O}_3$  sample

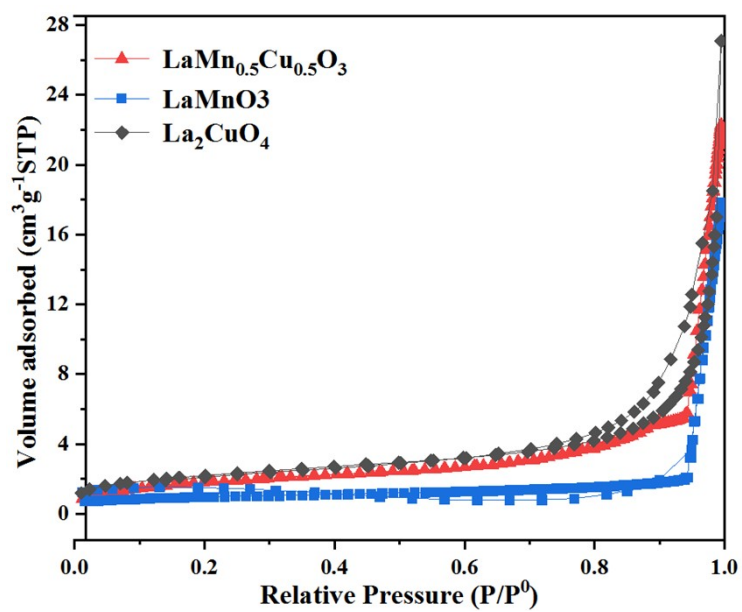

Figure S3.  $\text{N}_2$  adsorption/desorption isotherms of  $\text{La}_2\text{CuO}_4$ ,  $\text{LaMn}_{0.5}\text{Cu}_{0.5}\text{O}_3$  and  $\text{LaMnO}_3$ .

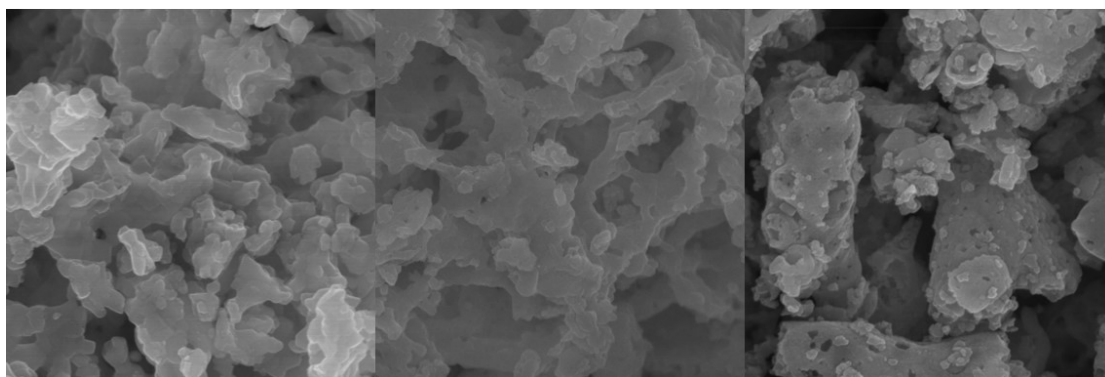

Figure S4. SEM images of spent  $\text{LaMn}_x\text{Cu}_{1-x}\text{O}_3$  samples (from left to right  $x = 1, 0.5,$   
0)

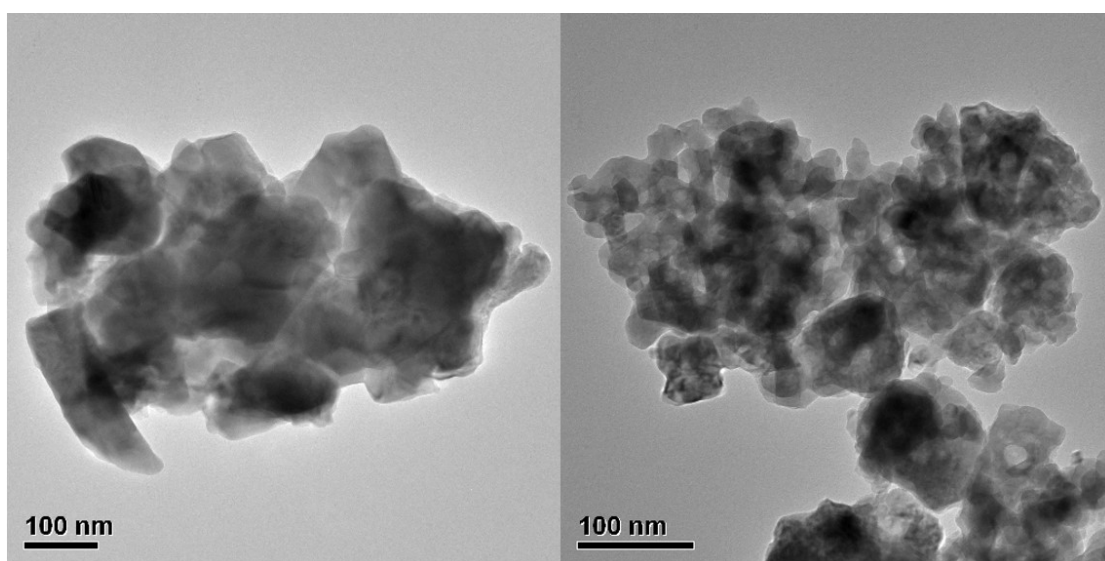

Figure S5. TEM images of spent  $\text{LaMn}_x\text{Cu}_{1-x}\text{O}_3$  samples (from left to right  $x = 0, 0.5$ )

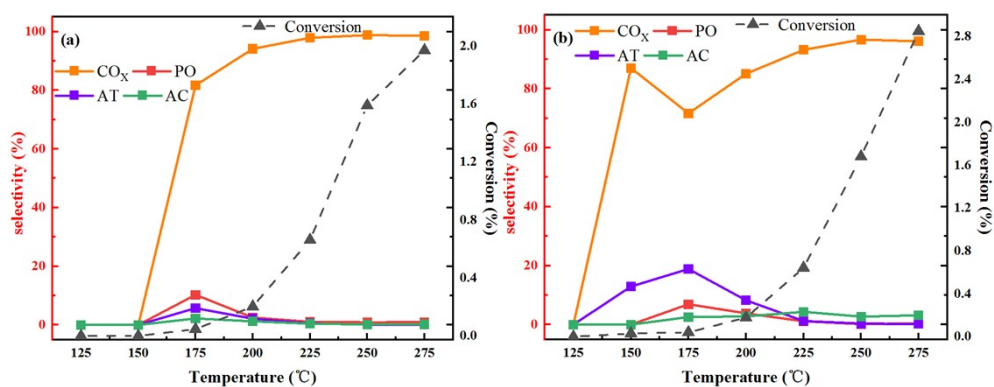

Figure S6. Products (PO: propylene oxide, AC: acrolein, AT: acetone) selectivity and propylene conversion over  $\text{LaMn}_{0.75}\text{Cu}_{0.25}\text{O}_3$  and  $\text{LaMn}_{0.25}\text{Cu}_{0.75}\text{O}_3$  in DEP reaction from 125 to 275 °C

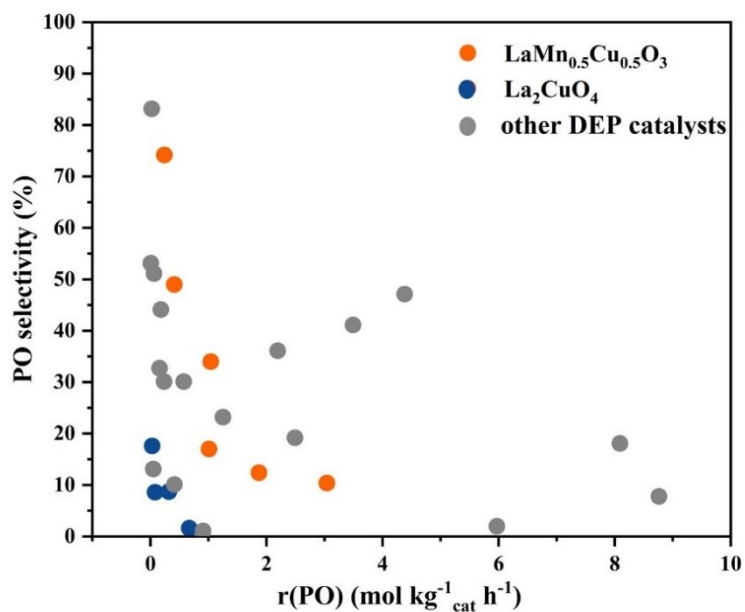

Figure S7. PO selectivity for  $\text{LaCu}_{0.5}\text{Mn}_{0.5}\text{O}_3$ ,  $\text{La}_2\text{CuO}_4$  and other DEP reaction catalysts as a function of PO formation rate.

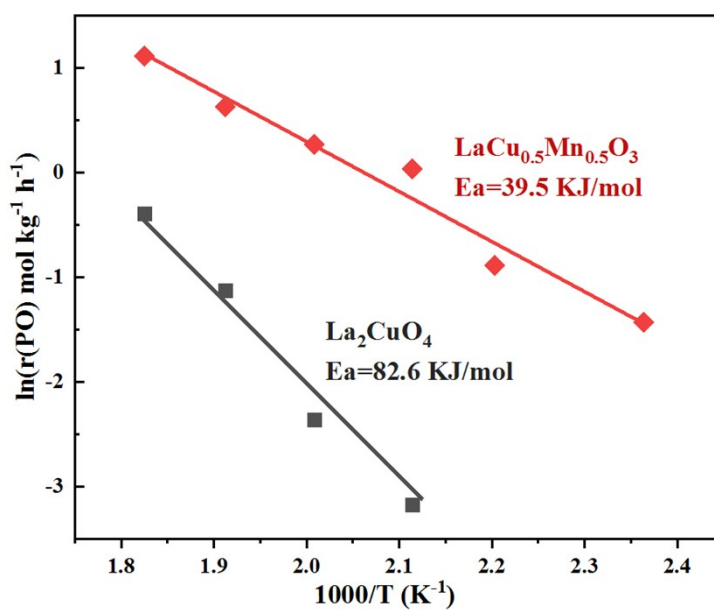

Figure S8. Apparent activation energy of  $\text{La}_2\text{CuO}_4$  and  $\text{LaMn}_{0.5}\text{Cu}_{0.5}\text{O}_3$  calculated by Arrhenius equation.

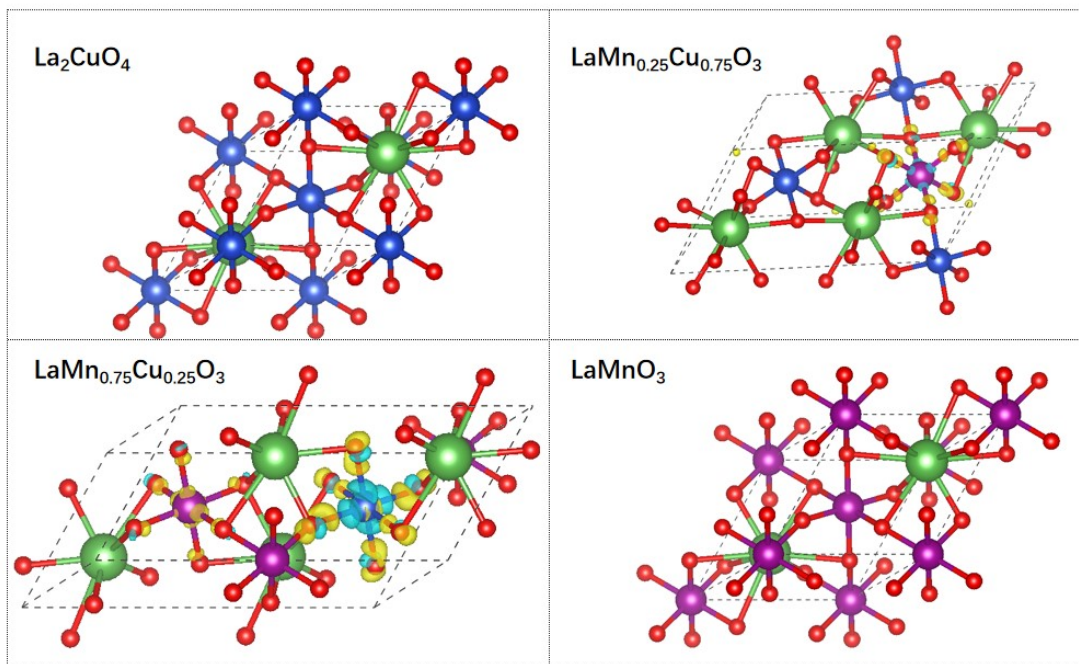

Figure S9. Electron density difference plots for  $\text{LaMn}_x\text{Cu}_{1-x}\text{O}_3$  ( $x = 0, 0.25, 0.75, 1$ ) samples

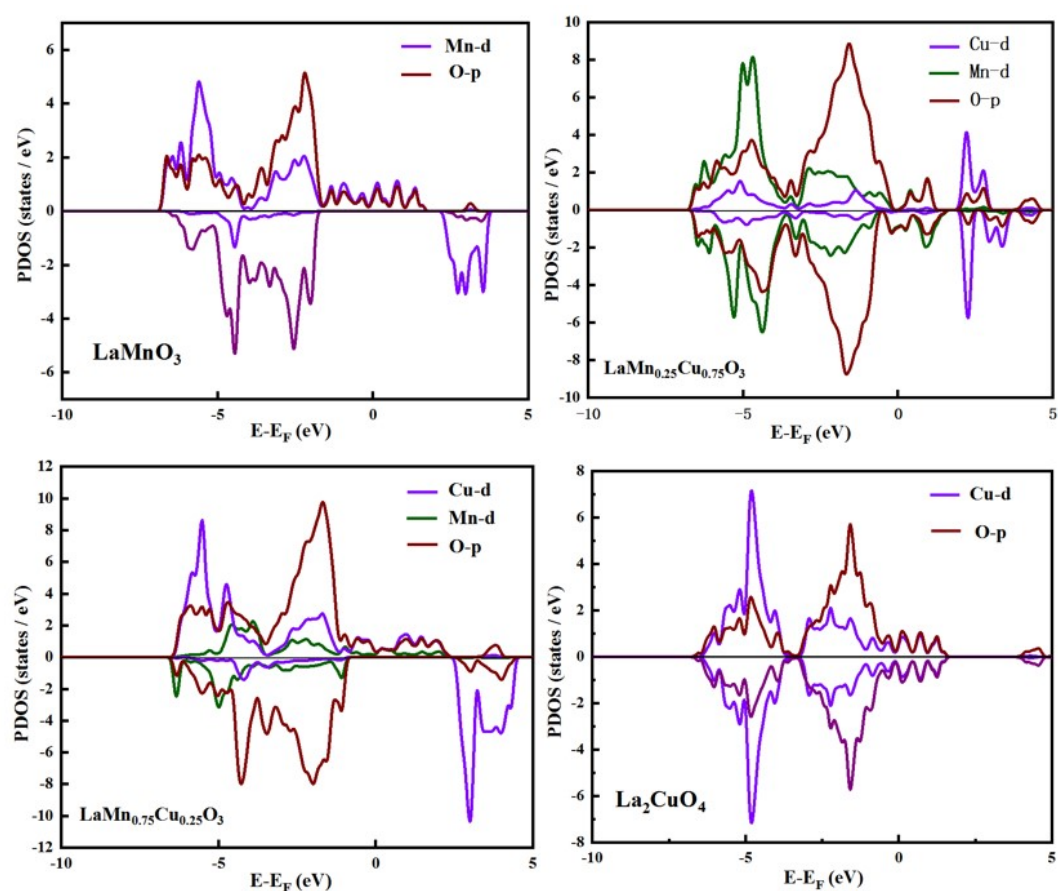

Figure S10. Density of states (DOS) plots for  $\text{LaMn}_x\text{Cu}_{1-x}\text{O}_3$  ( $x = 0, 0.25, 0.75, 1$ )

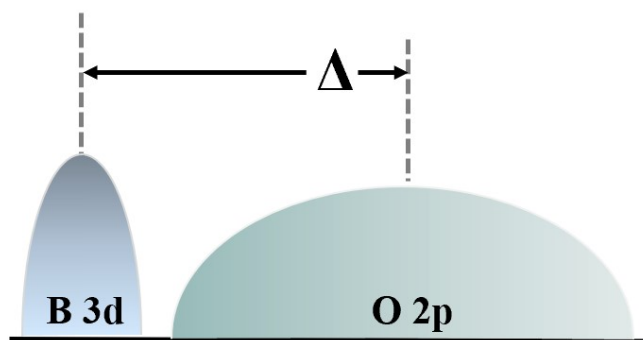

Figure S11. Charge-transfer energy schematic diagram of perovskite type oxides.

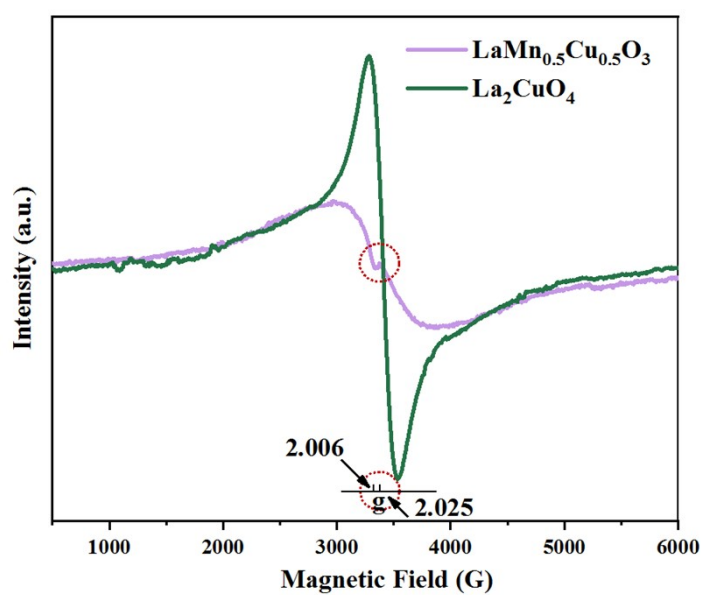

Figure S12. The EPR spectra of  $\text{LaMn}_{0.5}\text{Cu}_{0.5}\text{O}_3$  sample tested at room temperature

## 2. Scheme S1

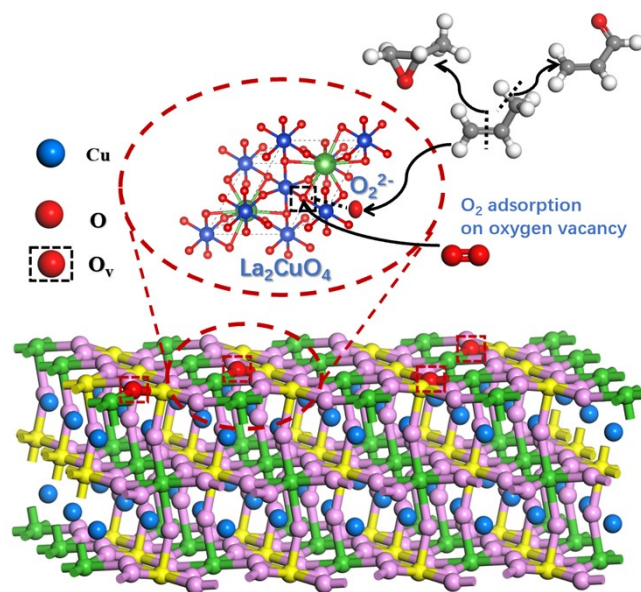

Scheme S1. Possible reaction model of the direct epoxidation of propylene with molecular oxygen over  $\text{La}_2\text{CuO}_4$  sample

As represented in Scheme S1,  $\text{O}_2$  was adsorbed and activated in the electronegative oxygen vacancies over  $\text{La}_2\text{CuO}_4$  sample forming  $\text{O}_2^{2-}/\text{O}^-$ , then reacted with propylene adsorbed on the surface of the metal cation at the B position. After desorption of the formed products, the oxygen vacancies sites on the perovskite oxides' surface were recovered. Based on previous studies,<sup>1</sup> the activation of dioxygen on oxygen vacancies not only required higher reaction temperature, but also the nucleophilicity of activated oxygen species was enhanced. Therefore, the  $\text{La}_2\text{CuO}_4$  catalyst showed poor low-temperature reducibility and poor selectivity for DEP reaction.

### 3. Table. S1 to S3

**Table S1. Catalytic performance of  $\text{LaCu}_x\text{Mn}_{1-x}\text{O}_3$  with different Cu/Mn molar ratios<sup>a</sup>**

| X    | r(PO)<br>( $\text{mol}\cdot\text{kg}^{-1}_{\text{cat.}}\cdot\text{h}^{-1}$ ) | Selectivity (%) |     |      |               | Conversion (%) |
|------|------------------------------------------------------------------------------|-----------------|-----|------|---------------|----------------|
|      |                                                                              | PO              | AT  | AC   | $\text{CO}_x$ |                |
| 0    | 0                                                                            | 0               | 0   | 0    | 1             | 1.71           |
| 0.25 | 0.08                                                                         | 2.6             | 2.1 | 1.2  | 94.1          | 0.21           |
| 0.5  | 1.04                                                                         | 33.9            | 5.6 | 4.2  | 56.3          | 0.20           |
| 0.75 | 0.11                                                                         | 3.8             | 8.3 | 2.8  | 85.1          | 0.18           |
| 1    | 0.04                                                                         | 17.4            | 0   | 33.7 | 48.9          | 0.02           |

<sup>a</sup>The data in the table above are tested at 200 °C.

**Table S2. Catalytic performance of  $\text{La}_2\text{CuO}_4$  and  $\text{LaCu}_{0.5}\text{Mn}_{0.5}\text{O}_3$  at different reaction temperatures**

| Catalyst                                     | temp.<br>(°C) | r(PO)<br>( $\text{mol}\cdot\text{kg}^{-1}_{\text{cat.}}\cdot\text{h}^{-1}$ ) | Selectivity (%) |      |      |               | Conversion<br>(%) |
|----------------------------------------------|---------------|------------------------------------------------------------------------------|-----------------|------|------|---------------|-------------------|
|                                              |               |                                                                              | PO              | AT   | AC   | $\text{CO}_x$ |                   |
| $\text{La}_2\text{CuO}_4$                    | 200           | 0.04                                                                         | 17.4            | 0    | 33.7 | 48.9          | 0.02              |
|                                              | 225           | 0.09                                                                         | 8.4             | 0    | 17.8 | 73.8          | 0.06              |
|                                              | 250           | 0.33                                                                         | 8.5             | 1.4  | 9.2  | 80.9          | 0.24              |
| $\text{LaCu}_{0.5}\text{Mn}_{0.5}\text{O}_3$ | 275           | 0.68                                                                         | 1.4             | 2.2  | 4.8  | 91.6          | 0.29              |
|                                              | 150           | 0.24                                                                         | 74.2            | 25.8 | 0    | 0             | 0.02              |
|                                              | 175           | 0.41                                                                         | 49              | 12.3 | 10.1 | 28.6          | 0.05              |
|                                              | 200           | 1.04                                                                         | 33.9            | 5.6  | 4.2  | 56.3          | 0.20              |
|                                              | 225           | 1.01                                                                         | 17.0            | 0    | 9.7  | 73.3          | 0.37              |
|                                              | 250           | 1.87                                                                         | 12.4            | 0.4  | 0.2  | 87.0          | 0.97              |
|                                              | 275           | 3.04                                                                         | 10.4            | 0.6  | 0.8  | 88.2          | 1.82              |



**Table S3. Catalytic performance of previous representative Cu-based samples on DEP reaction.**

| No | Catalyst                                                                        | PO sel.<br>(%) | Conv.<br>(%) | r(PO)<br>(mol·kg <sup>-1</sup> ·h <sup>-1</sup> ) | Temp.<br>(°C) | Ref. |
|----|---------------------------------------------------------------------------------|----------------|--------------|---------------------------------------------------|---------------|------|
| 1  | Cu/SiO <sub>2</sub>                                                             | 53.0           | 0.25         | 0.014                                             | 225           | 2    |
| 2  | VCe <sub>0.5</sub> Cu <sub>0.5</sub> -NaCl                                      | 32.6           | 0.26         | 0.165                                             | 250           | 3    |
| 3  | K <sup>+</sup> -CuO <sub>x</sub> /SBA-15                                        | 36.0           | 0.53         | 2.200                                             | 200           | 4    |
| 4  | Cu/SiO <sub>2</sub> -NaCl                                                       | 44.0           | 0.16         | 0.187                                             | 215           | 5    |
| 5  | RuO <sub>2</sub> -CuO-NaCl-TeO <sub>2</sub> -MnO <sub>x</sub> /SiO <sub>2</sub> | 23.1           | 14.55        | 1.258                                             | 250           | 6    |
| 6  | CuO-TiO <sub>2</sub> /SiO <sub>2</sub>                                          | 30.0           | 0.10         | 0.241                                             | 250           | 7    |
| 7  | RuO <sub>2</sub> -CuO-TiO <sub>2</sub> /SiO <sub>2</sub>                        | 7.70           | 15.40        | 8.776                                             | 250           | 7    |
| 8  | RuO <sub>2</sub> -CuO/SiO <sub>2</sub>                                          | 1.90           | 42.50        | 5.982                                             | 250           | 7    |
| 9  | (KAc)-Cu/SiO <sub>2</sub>                                                       | 19.1           | 0.27         | 2.500                                             | 325           | 8    |
| 10 | CuO <sub>x</sub> -SiO <sub>2</sub>                                              | 10.0           | 1.00         | 0.420                                             | 550           | 9    |
| 11 | K <sup>+</sup> -CuO <sub>x</sub> -SiO <sub>2</sub>                              | 30.0           | 0.48         | 0.580                                             | 550           | 9    |
| 12 | Cubic-Cu <sub>2</sub> O-27                                                      | 83.0           | 0.06         | 0.028                                             | 110           | 1    |
| 13 | NH <sub>4</sub> Cl-RD-Cu <sub>2</sub> O                                         | 51.0           | 0.15         | 0.068                                             | 200           | 10   |
| 14 | Cu <sub>2</sub> O rhombic dodecahedra                                           | 13.0           | 0.82         | 0.057                                             | 250           | 11   |
| 15 | RuO <sub>2</sub> -CuO-TeO <sub>2</sub> /SiO <sub>2</sub>                        | 41.0           | 0.37         | 3.500                                             | 250           | 12   |
| 16 | RuO <sub>2</sub> -CuO/SiO <sub>2</sub>                                          | 18.0           | 20.00        | 8.103                                             | 250           | 12   |
| 17 | RuO <sub>2</sub> -CuO-TeO <sub>2</sub> /SiO <sub>2</sub>                        | 47.0           | 0.35         | 4.390                                             | 250           | 12   |
| 18 | RuO <sub>2</sub> -CuO-NaCl/SiO <sub>2</sub>                                     | 1.0            | —            | 0.913                                             | 250           | 12   |

### References:

1. W. Xiong, X. Gu, Z. Zhang, P. Chai, Y. Zang, Z. Yu, D. Li, H. Zhang, Z. Liu and W. Huang, *Nat. Commun.*, 2021, **12**, 5921.
2. O. P. H. Vaughan, G. Kyriakou, N. Macleod, M. Tikhov and R. M. Lambert, *J. Catal.*, 2005, **236**, 401-404.
3. J. Lu, M. Luo, H. Lei, X. Bao and C. Li, *J. Catal.*, 2002, **211**, 552-555.
4. H. Chu, L. Yang, Q. Zhang and Y. Wang, *J. Catal.*, 2006, **241**, 225-228.

5. J. Lu, M. Luo and C. Li, *Chinese J. Catal.*, 2004, **25**, 327-333.
6. P. Phon-In, A. Seubsai, T. Chuksaw, K. Charoen, W. Donphai, P. Prapainainar, M. Chareonpanich, D. Noon, B. Zohour and S. Senkan, *Catal. Commun.*, 2016, **86**, 143-147.
7. T. Chuksaw, A. Seubsai, P. Phon-In, K. Charoen, T. Witoon, W. Donphai, P. Prapainainar, M. Chareonpanich, D. Noon and B. Zohour, *RSC Adv.*, 2016, **6**, 56116–56126.
8. W. Su, S. Wang, P. Ying, Z. Feng and C. Li, *J. Catal.*, 2009, **268**, 165-174.
9. W. Zhu, Q. Zhang and Y. Wang, *J. Phys. Chem. C*, 2008, **112**, 7731-7734.
10. C. Zhan, Q. Wang, L. Zhou, X. Han, J. Chen, Y. Zheng, Y. Wang, G. Fu, Z. Xie and Z. Tian, *J. Am. Chem. Soc.*, 2020, **142**, 14134-14141.
11. Q. Hua, T. Cao, X. Gu, J. Lu and W. Huang, *Angew. Chem. Int. Ed.*, 2014, **126**, 4856-4861.
12. A. Seubsai, C. Uppala, P. Tiencharoenwong and T. Chuksaw, *Catal. Lett.*, 2018, **148**, 586-600.
